# Supplementary material for: Identification of DNA methylation signatures for hepatocellular carcinoma detection and microvascular invasion prediction
Source: PubMed Central journal article supplement (PMC9720918; doi:10.1186/s40001-022-00910-w), 2022-12-05

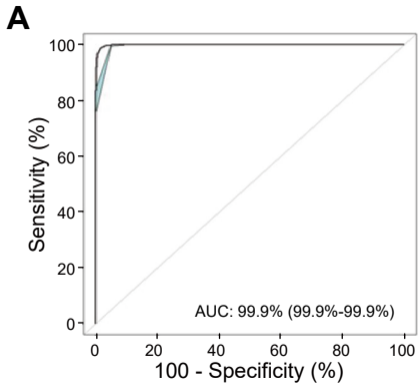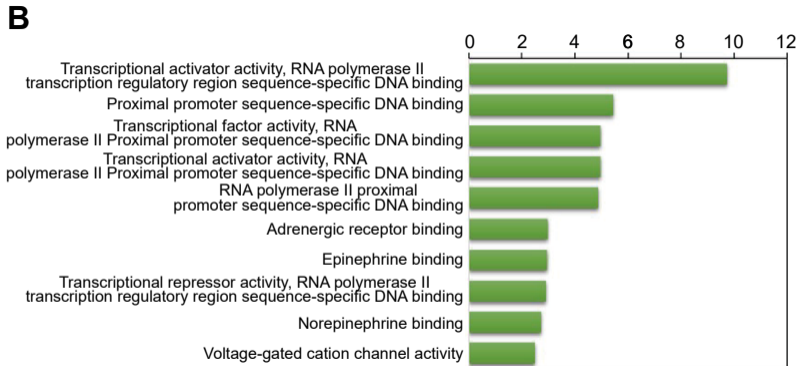

Supplement: 40001_2022_910_MOESM1_ESM.pdf [file 40001_2022_910_MOESM1_ESM.pdf]
