# Supplementary material for: Identification of DNA methylation signatures for hepatocellular carcinoma detection and microvascular invasion prediction
Source: PubMed Central journal article supplement (PMC9720918; doi:10.1186/s40001-022-00910-w), 2022-12-05
Supplement: 40001_2022_910_MOESM3_ESM.pdf [file 40001_2022_910_MOESM3_ESM.pdf]

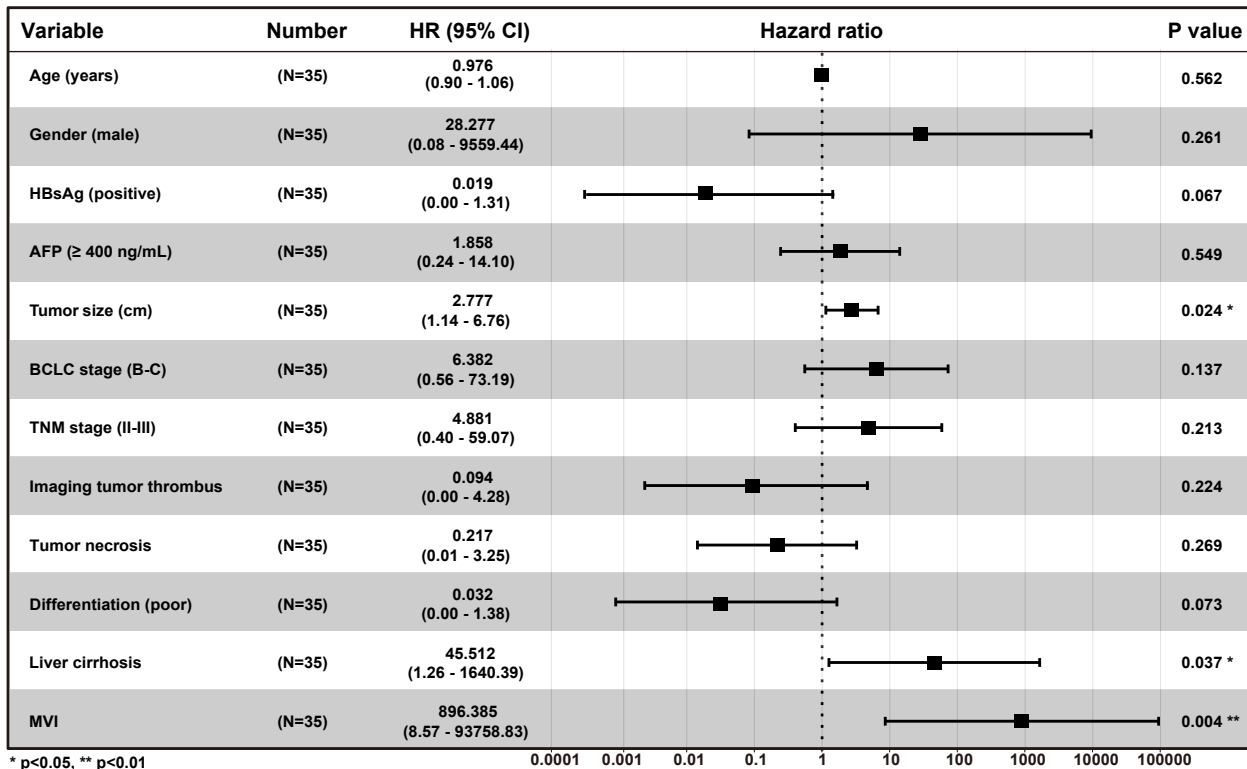

\* p<0.05, \*\* p<0.01

0.0001 0.001 0.01 0.1 1 10 100 1000 10000 100000
